# Supplementary material for: Impact of television coverage on the number and type of symptoms reported during a health scare: a retrospective pre–post observational study
Source: PubMed Central journal article supplement — BMJ Open. 2012 Aug 16;2(4):e001607. doi: 10.1136/bmjopen-2012-001607 (PMC3425900; doi:10.1136/bmjopen-2012-001607), 2012-08-16

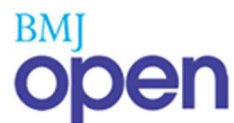

**Impact of Television Coverage on the Number and Type of Symptoms Reported During a Health Scare: A Retrospective Pre-Post Observational Study**

|                                 |                                                                                                                                                                                     |
|---------------------------------|-------------------------------------------------------------------------------------------------------------------------------------------------------------------------------------|
| Journal:                        | <i>BMJ Open</i>                                                                                                                                                                     |
| Manuscript ID:                  | bmjopen-2012-001607                                                                                                                                                                 |
| Article Type:                   | Research                                                                                                                                                                            |
| Date Submitted by the Author:   | 05-Jun-2012                                                                                                                                                                         |
| Complete List of Authors:       | Petrie, Keith; University of Auckland<br>Faasse, Kate; University of Auckland, Psychological Medicine<br>Gamble, Greg; University of Auckland, Department of Medicine<br>Cundy, Tim |
| <b>Primary Subject Heading</b>: | Public health                                                                                                                                                                       |
| Secondary Subject Heading:      | Pharmacology and therapeutics                                                                                                                                                       |
| Keywords:                       | Mass media, television, nocebo, symptoms                                                                                                                                            |
|                                 |                                                                                                                                                                                     |

SCHOLARONE™  
Manuscripts

1 **Running Title: Television Coverage and Health Scare Symptoms**

2  
3 **Impact of Television Coverage on the Number and Type of Symptoms**

4  
5  
6 **Reported During a Health Scare: A Retrospective Pre-Post**

7  
8  
9 **Observational Study**

10  
11  
12  
13  
14 Kate Faasse<sup>1</sup> PhD candidate, Health Psychology

15  
16 Greg Gamble<sup>2</sup> Statistician, Honorary Research Fellow

17  
18 Tim Cundy<sup>2</sup> Professor of Medicine

19  
20  
21 Keith J Petrie<sup>1</sup> Professor of Health Psychology

22  
23  
24  
25  
26 <sup>1</sup> Department of Psychological Medicine, Faculty of Medical and Health Sciences,  
27  
28 University of Auckland, Auckland, New Zealand

29  
30 <sup>2</sup> Department of Medicine, Faculty of Medical and Health Sciences, University of  
31  
32 Auckland, Auckland, New Zealand

33  
34  
35  
36  
37 Address for correspondence: Professor Keith Petrie, Department of Psychological  
38  
39 Medicine, University of Auckland, PO Box 92019, Auckland 1142, New Zealand, +649  
40  
41 3737599 ext 86564, [kj.petrie@auckland.ac.nz](mailto:kj.petrie@auckland.ac.nz)

42  
43  
44  
45  
46  
47 Word count: 4162

48  
49  
50  
51  
52 Keywords: Mass media, television, symptoms, nocebo.

## Running Title: Television Coverage and Health Scare Symptoms

### ABSTRACT

**Objectives:** This study investigated the impact of television news coverage on total adverse event reporting rates one month before and after the bulletins during a medication health scare. We further investigated whether individual side effects mentioned in each bulletin were reflected in the adverse event reports following the coverage. **Design:** A retrospective pre-post observational study. **Participants:** Adverse events reported to the New Zealand Centre for Adverse Reactions Monitoring from May to December 2008 relating to Eltroxin formulation change. **Primary and Secondary Outcome Measures:** Primary outcome measure was the total rate of adverse event reporting per day. Secondary outcome measure was the rate of reporting of seven individual symptoms mentioned in the television coverage. **Results:** After story 1 a significant increase in total reporting rates was evident ( $Med_{Pre} = 0$ ,  $Med_{Post} = 13.5$ ,  $U = 2$ ,  $p < .001$ ,  $r = -0.86$ ) with larger effect sizes for increases in television-mentioned symptoms. Story 2 also showed a significant increase in total adverse event reporting ( $Med_{Pre} = 6$ ,  $Med_{Post} = 18.5$ ,  $U = 86.5$ ,  $p = .002$ ,  $r = -0.49$ ) driven by significant increases only in television-reported symptoms. Story 3 did not result in a significant increase in total reporting ( $Med_{Pre} = 12$ ;  $Med_{Post} = 15.5$ ;  $U = 171$ ,  $p = .432$ ,  $r = -0.12$ ), and showed a significant increase in reporting rates for only one of the two television-reported symptoms. **Conclusions:** The findings suggest that television news coverage can impact the overall rate of adverse event reporting during a health scare, in part via increased reporting of media-mentioned side effects. The effects of television media coverage on adverse event reporting appear strongest for earlier reports.

## Running Title: Television Coverage and Health Scare Symptoms

### Article Summary

#### Article focus:

- Media coverage has the capacity to influence health behaviours and anxiety. This study sought to further understand the impact of media coverage on symptom reporting during a medication-related health scare.
- It was hypothesised that the total number of adverse event reports per day will increase significantly from the month before television news segments to the month following.
- It was also hypothesised that side effects specifically mentioned in television news reports will show greater increases from the month before the television news segment to the month following

#### Key messages:

- Television news coverage of a health scare can significantly increase adverse event reporting in the month following the news bulletin.
- Reported adverse events that are mentioned as possible medication side effects in television news coverage increase more than side effects that are not mentioned in news coverage.
- Early television news coverage has a greater impact on adverse event reporting than bulletins broadcast later in a health scare after previous coverage.

#### Strengths and limitations of this study:

This study used adverse event report data from a national medicines monitoring database generated during a real-world medication-related health scare and actual television news coverage of the event. Creating a believable scenario of this scale in a laboratory setting

**Running Title: Television Coverage and Health Scare Symptoms**

1  
2  
3 is not feasible, and thus this study provides insight into the real impact of television  
4  
5 media coverage on the volume and type of symptoms reported during a health scare.  
6  
7

8 While this approach results in high ecological validity, as with any observational study  
9  
10 there is a corresponding reduction in control of potential confounds.  
11  
12  
13  
14  
15  
16  
17  
18  
19  
20  
21  
22  
23  
24  
25  
26  
27  
28  
29  
30  
31  
32  
33  
34  
35  
36  
37  
38  
39  
40  
41  
42  
43  
44  
45  
46  
47  
48  
49  
50  
51  
52  
53  
54  
55  
56  
57  
58  
59  
60

For peer review only

**Running Title: Television Coverage and Health Scare Symptoms****Introduction**

News coverage can influence health behaviour in both positive and negative ways. There is evidence that media coverage can increase public anxiety by spreading fear of illness or contamination and greatly increasing demand for health services. A recent misleading media report in Japan about a “significant complication” in a cancer vaccine trial resulted in patient anxiety and an influx of inquiries which overwhelmed staff and resulted in temporary suspension of clinical trials and hospital services.[1] Intense media coverage of medically-unexplained adverse events following influenza A (H1N1) vaccination of school students in Taiwan spread fear and likely facilitated subsequent symptom clusters, ultimately resulting in sub-optimal levels of vaccination.[2] Similarly, media coverage of a suspected but unsubstantiated gas poisoning in the West Bank in 1983 facilitated the spread of psychogenic symptoms to over 900 people over two weeks.[3 4] There is evidence of media spread of symptoms reported by-proxy where parents of school children thought to be exposed to natural gas leaks reported various symptoms in their children at increased rates following intense media coverage.[5]

Misinformation in reports can also impact on health behaviour. Perhaps the most salient medical media controversy in recent times, media reporting on the MMR vaccine has misled the public about the weight of evidence for the safety of the vaccine.[6-8] The inaccurate reporting has impacted vaccination outcomes, with vaccination rates in England falling following the media coverage,[9] and parents who report getting information about the MMR vaccine from media sources less likely to accept a second dose of the MMR vaccine for their children.[10]

**Running Title: Television Coverage and Health Scare Symptoms**

1  
2  
3  
4  
5  
6 It should also be noted that media coverage also has the potential have a positive impact  
7  
8 on health-related behaviour. When news broke that Kylie Minogue had been diagnosed  
9  
10 with breast cancer, mammography appointment bookings in Australia rose 40% overall  
11  
12 with a 101% increase in bookings for previously non-screened women.[11] A similar  
13  
14 pattern emerged in cervical cancer screening in the United Kingdom following the  
15  
16 diagnosis and death of reality television personality Jade Goody.[12] Colonoscopy use  
17  
18 increased following Katie Couric's colorectal cancer awareness campaign in the United  
19  
20 States.[13] Media coverage has also increased sales of iodised salt following coverage of  
21  
22 iodine deficiency disorders.[14] More recently media coverage of research demonstrating  
23  
24 increased rates of stroke, coronary heart disease and breast cancer in women taking  
25  
26 combination hormone replacement therapy has been linked to declines in the use of  
27  
28 hormone therapy,[15] decreased prescriptions [16] and higher discontinuation of  
29  
30 treatment.[17] Greater decreases in use were seen in women exposed to more media  
31  
32 coverage which linked hormone replacement therapy to higher rates of cancer and heart  
33  
34 disease.[18]  
35  
36  
37  
38  
39  
40  
41  
42

43 One of the difficulties in researching how media reports influence the reporting of  
44  
45 symptoms during a health scare is that it is rarely possible to get measures of the level of  
46  
47 symptoms prior to a scare. However, a recent medication-related health scare in New  
48  
49 Zealand has enabled us to examine the effect of television news reporting on the volume  
50  
51 and type of symptoms reported by using data available through New Zealand's national  
52  
53 monitoring centre for drug adverse reactions. Moreover, it enabled us to look at whether  
54  
55  
56  
57  
58  
59  
60

**Running Title: Television Coverage and Health Scare Symptoms**

1  
2  
3 mentioning a specific side effect in a television bulletin resulted in an increase in the rates  
4  
5 of reporting of that specific symptom to the Centre for Adverse Reactions Monitoring  
6  
7 following the bulletin.  
8  
9

10  
11  
12 In New Zealand prior to 2008 the only publicly funded brand of thyroxine used for  
13  
14 thyroid hormone replacement treatment was the Eltroxin brand. During 2007 and 2008  
15  
16 the manufacturers made a change in the formulation of their tablets. While the active  
17  
18 ingredient in the tablets remained unchanged, the 100 µg tablets were changed from  
19  
20 yellow to white and labelled as levothyroxine rather than thyroxine. Testing of the new  
21  
22 tablets revealed that they contained the same levels of active ingredient, were  
23  
24 bioequivalent to an older formulation, and contained no unexpected ingredients.  
25  
26

27  
28 However, the change resulted in a dramatic increase in reporting of adverse reactions to  
29  
30 the drug to the New Zealand Centre for Adverse Reactions Monitoring. Further details  
31  
32 about the response to the medication change and the factors involved in the development  
33  
34 of the health scare have been discussed previously.[19]  
35  
36  
37  
38

39  
40  
41 In this study we examined the effect of three television news stories on the number and  
42  
43 type of adverse reaction reports received by the Centre for Adverse Reactions  
44  
45 Monitoring. Based on previous research, we predicted that adverse event reporting  
46  
47 would occur at a higher rate during the month following a television news story than in  
48  
49 the month preceding the story, and that the rates of reporting of media-mentioned  
50  
51 symptoms (but not unmentioned symptoms) would be higher during the month following  
52  
53 television media coverage than in the month before.  
54  
55  
56  
57  
58  
59  
60



## Running Title: Television Coverage and Health Scare Symptoms

### Methods

#### Media Coverage

Television news coverage of the formulation change was chosen for assessment because television is a widely viewed news source that has national coverage and is generally viewed by the public on the same date. In order to identify all television news reports available that went to air between May and December 2008, a comprehensive search strategy was used. Searches were conducted on online news databases (Australia / New Zealand Reference Centre, Factiva, Index New Zealand, Newztext Plus), commonly used news websites (stuff.co.nz, nzherald.co.nz), and on the websites of the three free-to-air national television news stations (tvnz.co.nz, 3news.co.nz, primetv.co.nz) using a standard list of search terms (Eltroxin, Goldshield, Synthroid, thyroid, thyroxine, levothyroxine, hypothyroid, hypothyroidism, GSK, Glaxo, GlaxoSmithKline). From these searches, three television news stories were identified [20-22] which went to air on June 17, August 15 and September 10. Videos were retrieved from the relevant website and the clips were transcribed. From these transcripts, a list of all media-reported side effects attributed to Eltroxin was generated.

#### Adverse Drug Reactions

Adverse drug reaction reporting data was obtained from the Centre for Adverse Reactions Monitoring (CARM) through Medsafe (New Zealand's medicines and medical devices monitoring agency) following an Official Information Act request. CARM collects adverse event reports about medications. These reports are generally made by GPs,

**Running Title: Television Coverage and Health Scare Symptoms**

1  
2  
3 pharmacists, hospitals and pharmaceutical companies, though patients can also report  
4  
5 directly to the centre. Data provided included the date that the report was received and  
6  
7 processed by CARM and up to five reported symptoms. Reports were anonymous and no  
8  
9 identifying information was provided. Data was obtained for May 2008 to December  
10  
11 2008 inclusive, providing adverse event reporting information for the eight months  
12  
13 during which the highest rates of reporting occurred. The current research did not require  
14  
15 separate ethical approval as the study utilised publicly available data and patients who  
16  
17 made the ADR reports remained anonymous to the researchers.  
18  
19  
20  
21  
22  
23

*Symptoms*

24  
25  
26 To enable comparisons between the symptoms mentioned in the television media  
27  
28 coverage and those mentioned in adverse event reports, all reports were reviewed and  
29  
30 media-mentioned symptoms were matched with reported symptoms that best represented  
31  
32 them. Symptoms mentioned in at least one of the three television news reports were  
33  
34 headache, tiredness, memory problems, nausea, vomiting, vision loss, blurred vision,  
35  
36 blindness, light sensitivity, dry eyes, dry mouth, swollen ankles, itching, aches and pains,  
37  
38 arthritis, trembles, and unsteadiness. Symptoms that were reported in less than 5% (n =  
39  
40 69) of all Eltroxin-reformulation adverse event reports were excluded (vomiting, light  
41  
42 sensitivity, dry eyes, dry mouth, swollen ankles, arthritis and trembles). Because vision  
43  
44 symptoms (vision loss, blurred vision and blindness) were reported once each in the three  
45  
46 media reports, these were grouped as 'vision problems' for the analyses. The media-  
47  
48 reported symptom of 'aches and pains' was considered too broad, with no logical  
49  
50 corresponding general 'pain' symptoms in the adverse event report data, so was excluded  
51  
52  
53  
54  
55  
56  
57  
58  
59  
60

## Running Title: Television Coverage and Health Scare Symptoms

1  
2  
3 from the analyses. 'Unsteadiness' was not easily matched with adverse event report  
4  
5 symptoms, but was considered similar to dizziness, faintness, vertigo or ataxia (lack of  
6  
7 coordination), which were grouped together for analysis. The media-reported symptoms  
8  
9 and their corresponding adverse event report symptoms can be seen in Table 1.  
10  
11

12  
13  
14  
15 (Insert Table 1 about here)  
16  
17  
18  
19  
20

### 21 22 Statistical Analysis 23

24 A period of one month (four weeks) before and after each television segment was used to  
25  
26 investigate the impact of media reporting. No adverse event reports were recorded on  
27  
28 weekend days, thus analyses were carried out only using data on the number of reports  
29  
30 each weekday during each four week total time period, resulting in a total of 20 weekdays  
31  
32 before and after each television report being used in the analyses. This time frame was  
33  
34 chosen to allow for enough data in order to generate reliable analyses, but was restricted  
35  
36 enough to limit overlap between the month after the first television coverage and the  
37  
38 month before the second television coverage. Because the third news story went to air  
39  
40 less than a month after the second, an overlap of 17 days for these time periods was  
41  
42 unavoidable.  
43  
44  
45  
46  
47  
48  
49

50 The distributions of the daily rates of total adverse event reporting and rates of reporting  
51  
52 of individual symptoms were non-normal and non-parametric tests were utilised. Mann-  
53  
54 Whitney U tests were used to investigate the number of adverse events reported per day  
55  
56  
57  
58  
59  
60

## Running Title: Television Coverage and Health Scare Symptoms

for both total number of reports and individual symptoms before and after each television news report. Specific media-reported symptoms (headache, itching, memory problems, nausea, tiredness, unsteadiness and vision problems) not mentioned in a given television report were treated as control comparison symptoms.

All tests were two-tailed,  $p < .05$  was considered significant.

## Results

### Adverse Event Reports Per Month

Figure 1 gives an overview of the pattern of adverse event reports made to the Centre for Adverse Reactions Monitoring from January to December 2008. The largest increases in month-by-month reporting came between May and June, and August and September.

(Insert Figure 1 about here)

### Total Adverse Event Reports Per Day

The number of reports per day increased significantly from the month before news story 1 (Mdn = 0) to the month after (Mdn = 13.5,  $U = 2.0$ ,  $p < .001$ ,  $r = -0.86$ ) (see Figure 2). Reporting had not returned to pre-media levels during the month before news story 2 (Mdn = 6). Nonetheless a significant increase in adverse event reporting was also seen from the month before to the month after the second television report (Mdn = 18.5,  $U = 86.5$ ,  $p = .002$ ,  $r = -0.49$ ). There was a large overlap (17 reporting days) between the month after news story 2 and the month before news story 3. There was not a significant

**Running Title: Television Coverage and Health Scare Symptoms**

1  
2  
3 additional impact of the third television report on the rate of symptom reporting ( $Mdn_{pre}$   
4 = 12,  $Mdn_{post}$  = 15.5,  $U$  = 171,  $p$  = .432,  $r$  = -0.12).  
5  
6  
7  
8  
9

10 (Insert Figure 2 about here)  
11  
12  
13

*Individual Symptoms Reported Per Day**News Story 1*

14  
15  
16  
17  
18  
19  
20 There was a significant increase in the rate of adverse event reports containing the  
21 investigated symptoms from the month before news story 1 to the month after. This was  
22 found for all individual symptoms, whether or not they were mentioned in the television  
23 news story (see Table 2). The effect size for the increases associated with symptoms  
24 mentioned in news story 1 (headache, nausea and vision problems) were notably higher ( $r$   
25 = -0.82, -0.75 and -0.78 respectively) than those associated with the unmentioned  
26 symptoms (all  $r$  values < -0.60).  
27  
28  
29  
30  
31  
32  
33  
34  
35  
36  
37  
38  
39  
40  
41  
42  
43  
44  
45  
46  
47  
48  
49  
50  
51  
52  
53  
54  
55  
56  
57  
58  
59  
60

(Insert Table 2 about here)

*News Story 2*

46 Five symptoms (headache, vision loss, itching, memory problems and tiredness) were  
47 mentioned in the second television news story. The rate of reporting for all of the  
48 mentioned symptoms increased significantly (all  $p$  values < .03) from the month before to  
49 the month after the media coverage, while the rate of reporting for the two unmentioned  
50  
51  
52  
53  
54  
55  
56  
57  
58  
59  
60

**Running Title: Television Coverage and Health Scare Symptoms**

1  
2  
3 symptoms (nausea and unsteadiness) did not show significant increases (all p values >  
4  
5 .09) (see Table 2).  
6  
7  
8  
9

*News Story 3*

10  
11  
12 Only two symptoms (vision loss and unsteadiness) were mentioned in the third news  
13  
14 story. The rate of reporting for unsteadiness increased significantly from before (Med =  
15  
16 0.5) to after (Med = 2.0) the third television news story (p = .028) (see Table 2). The rate  
17  
18 of reporting of vision problems also increased from before (Med = 2.0) to after (Med =  
19  
20 4.5) the television coverage, however this difference was not significant (p = .12). This  
21  
22 may be due to the consistent media coverage of vision problems across all three  
23  
24 television news stories. In addition, the month before news story 3 had a large overlap  
25  
26 with the month after news story 2 in which vision problems were also mentioned, and  
27  
28 reporting of vision problems was already elevated. The rates of reporting of the five  
29  
30 remaining unmentioned symptoms did not change significantly over this time period (all  
31  
32 p values > .17).  
33  
34  
35  
36  
37  
38  
39  
40  
41

**Discussion**

42  
43  
44  
45 Television media coverage during the Eltroxin formulation-change health scare impacted  
46  
47 both the volume and content of adverse effect reporting from the month before to the  
48  
49 month after each of the three news stories, and had a differential impact on adverse event  
50  
51 reporting as time went on. News story 1, which was the first television news coverage of  
52  
53 the formulation change, had a dramatic impact on total symptom reporting. The rates of  
54  
55 reporting for all symptoms assessed increased significantly regardless of whether they  
56  
57  
58  
59  
60

**Running Title: Television Coverage and Health Scare Symptoms**

1  
2  
3 were mentioned in this report or not, although the effect sizes associated with the changes  
4  
5 suggest that the effect of the media coverage was strongest for the symptoms that were  
6  
7 mentioned. News story 2 also generated a significant increase in the total adverse event  
8  
9 reporting. Further investigation of individual symptoms suggests that this increase was  
10  
11 primarily driven by significant increases in reporting rates only in symptoms that were  
12  
13 mentioned in the second television news coverage. Total symptom reporting rates did not  
14  
15 increase significantly following news story 3, and while both symptoms mentioned in the  
16  
17 coverage increased, only the symptom that hadn't already been mentioned in the previous  
18  
19 television report reached significance.  
20  
21  
22  
23

24  
25  
26  
27 Increases in symptom reporting are likely to have been caused by at least two different  
28  
29 processes. First, exposure to television news coverage about health risks can increase  
30  
31 viewers' anxiety about their own health.[23 24] Increased levels of anxiety are  
32  
33 consistently associated with increased symptom reporting.[25] This process is likely to be  
34  
35 responsible for part of the large increase in symptoms reported as shown by the rise in the  
36  
37 overall rate of symptom reporting and increases in all individual symptoms assessed  
38  
39 following the first television news report.  
40  
41  
42  
43

44  
45  
46 Second, television news coverage of selected individuals' specific symptoms is likely to  
47  
48 have increased thyroxine patients' expectations of specific side effects. This is likely to  
49  
50 have promoted increased attention to the set of symptoms reported in the media. This led  
51  
52 to elevated numbers of symptoms specifically mentioned in the television news media, as  
53  
54 seen particularly following the second and third television news stories. These results are  
55  
56  
57  
58  
59  
60

**Running Title: Television Coverage and Health Scare Symptoms**

1  
2  
3 in line with previous studies which have found that the awareness of specific potential  
4 medication side effects can increase the reporting of those side effects. [26-28]  
5  
6  
7  
8  
9

10 These findings invite consideration of current health media coverage, which in the case of  
11 Eltroxin was often based around dramatic stories told by individual patients about their  
12 experiences of extremely unpleasant adverse events following the medication formulation  
13 change. More balanced coverage including alternate viewpoints, with input from health  
14 professionals and government agencies, and without sensationalised coverage of  
15 potentially unrelated individual symptom experiences - which are widely acknowledged  
16 to be highly variable - could have been of benefit.  
17  
18  
19  
20  
21  
22  
23  
24  
25  
26  
27  
28

**Limitations**

29  
30  
31 The current study focused on adverse events reported to the Centre of Adverse Reactions  
32 Monitoring, and thus may not generalise to patients who experienced adverse events but  
33 did not report them either to CARM or to a healthcare provider. This limitation may also  
34 be viewed as a strength of the study. The data generally came from people who went to  
35 the trouble of making a report or talking to a medical professional who then made the  
36 report on their behalf. The use of this outcome data likely reduced the impact of the  
37 television news media on symptom reporting in comparison to questionnaire-based  
38 assessment of side effects, likely making the current findings more robust. While the use  
39 of a real-world case study enhances the ecological validity of the current research, this  
40 approach also precludes controlling potential confounding variables.  
41  
42  
43  
44  
45  
46  
47  
48  
49  
50  
51  
52  
53  
54  
55  
56  
57  
58  
59  
60



**Running Title: Television Coverage and Health Scare Symptoms**Conclusions

Television news coverage of a medication-related health scare has the potential to dramatically increase the overall rate of adverse event reporting in the month following a news story, particularly in the early stages of a health scare. This may be because such news coverage increases anxiety in viewers, leading to a general increase in symptoms that people experience. The reporting of symptoms specifically mentioned in television news coverage also increased significantly following the news stories, likely by increasing viewers' expectations that they too would experience similar side effects.

**Running Title: Television Coverage and Health Scare Symptoms****Acknowledgments**

[The authors would like to thank Medsafe New Zealand for their assistance in obtaining the adverse event reporting data used in this study.](#)

**Competing Interests**

None declared.

**Funding**

This research received no specific grant from any funding agency in the public, commercial or not-for-profit sectors.

**Authors' Contributions**

KF: Conception and design of the study; analysis and interpretation of data; collection and assembly of data; drafting of the article; critical revision of the article for important intellectual content; final approval of the article.

GG: Analysis and interpretation of data; critical revision of the article for important intellectual content; final approval of the article.

TC: Conception and design of the study; critical revision of the article for important intellectual content; final approval of the article.

KP: Conception and design of the study; collection and assembly of data; drafting of the article; critical revision of the article for important intellectual content; final approval of the article.

**Running Title: Television Coverage and Health Scare Symptoms****References**

1. Yuji K, Narimatsu H, Tanimoto T, Komatsu T, Kami M. Sharing information on adverse events. *Lancet* 2011;**377**:1654
2. Huang WT, Hsu CC, Lee PI, Chuang JH. Mass psychogenic illness in nationwide in-school vaccination for pandemic influenza A(H1N1) 2009, Taiwan, November 2009-January 2010. *Euro Surveill* 2010;**15**(21):1-3
3. Modan B, Swartz TA, Tirosh M, et al. The Arjenyattah epidemic a mass phenomenon: spread and triggering factors. *Lancet* 1983;**31**(1472-1474)
4. Hefez A. The role of the press and the medical community in the epidemic of "mysterious gas poisoning" in the Jordan West Bank. *Am J Psychiatry* 1985;**142**:833-37
5. Philen RM, Kilbourne EM, McKinley TW, Parrish RG. Mass sociogenic illness by proxy: parentally reported epidemic in an elementary school. *Lancet* 1989;**334**:1372-76
6. Dobson R. Media misled the public over the MMR vaccine, study says. *BMJ* 2003;**326**:1107
7. Speers T, Lewis J. Journalists and jobs: media coverage of the MMR vaccine. *Commun Med* 2004;**1**:171-81
8. Goldacre B. MMR: the scare stories are back. *BMJ* 2007;**335**:126-27
9. Scanlon TJ. MMR vaccine uptake may be lower than reported because of manipulation of target groups. *BMJ* 2002;**324**:733

**Running Title: Television Coverage and Health Scare Symptoms**

- 1  
2  
3  
4 10. Petrovic M, Roberts R, Ramsay M, Charlett A. Parents' attitude towards the second  
5  
6 dose of measles, mumps and rubella vaccine: a case-control study. *Commun Dis*  
7  
8 *Public Health* 2003;**6**:325-29  
9
- 10 11. Chapman S, McLeod K, Wakefield M, Holding S. Impact of news of celebrity illness  
11  
12 on breast cancer screening: Kylie Minogue's breast cancer diagnosis. *MJA*  
13  
14 2005;**183**:247-50  
15  
16
- 17 12. Bowring J, Walker P. The "Jade Goody effect": what now for cervical cancer  
18  
19 prevention? *J Fam Plann Reprod Health Care* 2010;**36**:51-54  
20  
21
- 22 13. Cram P, Fendrick M, Inadomi J, Cowen ME, Carpenter D, Vijan S. The impact of a  
23  
24 celebrity promotional campaign on the use of colon cancer screening: the Katie  
25  
26 Couric effect. *Arch Intern Med* 2003;**163**:1601-05  
27  
28
- 29 14. Li M, Chapman S, Agho K, Eastman CJ. Can even minimal news coverage influence  
30  
31 consumer health-related behaviour? A case study of iodized salt sales, Australia.  
32  
33 *Health Educ Res* 2008;**23**:543-48  
34  
35
- 36 15. Haas JS, Kaplan CP, Gerstenberger EP, Kerlikowske K. Changes in the use of  
37  
38 postmenopausal hormone therapy after the publication of clinical trials. *Ann*  
39  
40 *Intern Med* 2004;**140**:184-88  
41  
42
- 43 16. Majumdar SR, Almasi EA, Stafford RS. Promotion and prescribing of hormone  
44  
45 therapy after report of harm by the Women's Health Initiative. *JAMA*  
46  
47 2004;**292**:1983-88  
48  
49
- 50 17. Lawton B, Rose S, McLeod D, Dowell A. Changes in use of hormone replacement  
51  
52 therapy after the report from the Women's Health Initiative: cross sectional survey  
53  
54 of users. *BMJ* 2003;**327**:845-46  
55  
56  
57  
58  
59  
60

**Running Title: Television Coverage and Health Scare Symptoms**

- 1  
2  
3  
4  
5  
6  
7  
8  
9  
10  
11  
12  
13  
14  
15  
16  
17  
18  
19  
20  
21  
22  
23  
24  
25  
26  
27  
28  
29  
30  
31  
32  
33  
34  
35  
36  
37  
38  
39  
40  
41  
42  
43  
44  
45  
46  
47  
48  
49  
50  
51  
52  
53  
54  
55  
56  
57  
58  
59  
60
18. Haas JS, Miglioretti DL, Geller B, et al. Average household exposure to newspaper coverage about the harmful effects of hormone therapy and population-based declines in hormone therapy use. *JGIM* 2007;**22**:68-73
19. Faasse K, Cundy T, Pertie KJ. Thyroxine: anatomy of a health scare. *BMJ* 2009;**339**:b5613
20. 3 News. Change of drug formula making patients feel worse, 17 June 2008.
21. 3 News. Government to announce alternative drug to Eltroxin, 10 September 2008.
22. TVNZ Close Up. Thyroid, 15 August 2008.
23. Lemal M, Van den Bulck J. Television news exposure is related to fear of breast cancer. *Prev Med* 2009;**48**:189-92
24. Lemal M, Van den Bulck J. Television news coverage about cervical cancer: impact on female viewers' vulnerability perceptions and fear. *Eur J Public Health* 2010;**21**:381-86
25. Piccinelli M, Simon G. Gender and cross-cultural differences in somatic symptoms associated with emotional distress: an international study in primary care. *Psychol Med* 1997;**27**:433-44
26. Cocco G. Erectile dysfunction after therapy with Metoprolol: the Hawthorne Effect. *Cardiology* 2009;**112**:174-77
27. Myers MG, Cairns JA, Singer J. The consent form as a possible cause of side effects. *Clin Pharmacol Ther* 1987;**42**:250-53
28. Silvestri A, Galetta P, Cerquetani E, et al. Report of erectile dysfunction after therapy with beta-blockers is related to patient knowledge of side effects and is reversed by placebo. *Eur Heart J* 2003;**24**:1928-32

**Running Title: Television Coverage and Health Score Symptoms**

**Figure 1.** Bar graph showing the number of individual adverse events reported by month during 2008.

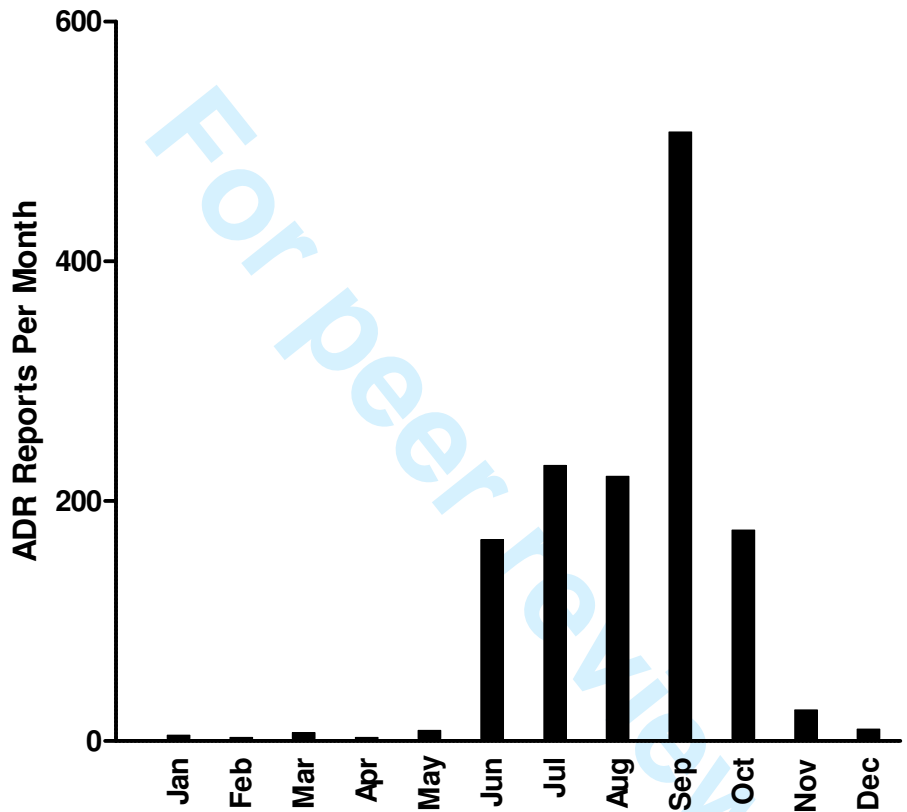

1  
2  
3  
4  
5  
6  
7  
8  
9  
10  
11  
12  
13  
14  
15  
16  
17  
18  
19  
20  
21  
22  
23  
24  
25  
26  
27  
28  
29  
30  
31  
32  
33  
34  
35  
36  
37  
38  
39  
40  
41  
42  
43  
44  
45  
46  
47  
48  
49  
50  
51  
52  
53  
54  
55  
56  
57  
58  
59  
60

**Running Title: Television Coverage and Health Scare Symptoms**

**Figure 2.** Box and whisker plots showing median (with inter-quartile range and total range) number of adverse event reports per day for the month before and after each of the three television news stories.

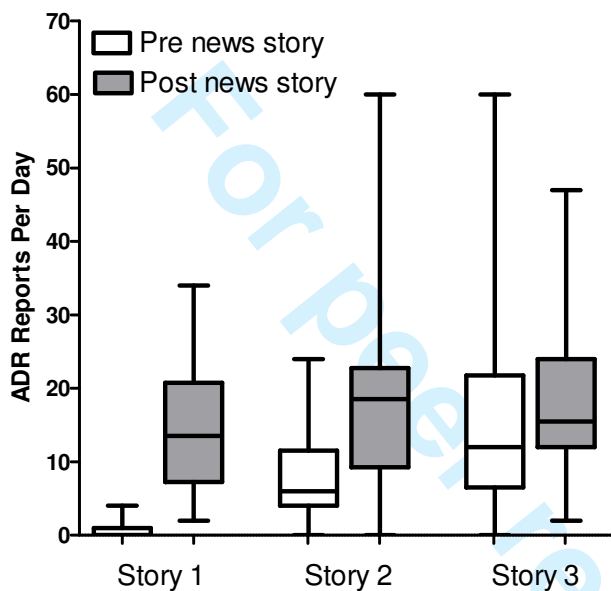

**Running Title: Television Coverage and Health Scare Symptoms****Table 1.** Side effects mentioned in television news coverage and corresponding symptoms in Centre for Adverse Reactions Monitoring data.

| News Story | Television-mentioned symptoms | Corresponding adverse reactions in CARM database    |
|------------|-------------------------------|-----------------------------------------------------|
| Story 1    | Headache                      | Headache                                            |
|            | Nausea                        | Nausea                                              |
|            | Vision problems               | Vision blurred, Vision abnormal, Visual disturbance |
| Story 2    | Headache                      | Headache                                            |
|            | Vision problems               | Vision blurred, Vision abnormal, Visual disturbance |
|            | Itching                       | Pruritus                                            |
|            | Tired                         | Tiredness                                           |
|            | Memory problems               | Memory disturbance, Memory impairment, Memory loss  |
| Story 3    | Vision problems               | Vision blurred, Vision abnormal, Visual disturbance |
|            | Unsteadiness                  | Dizzy, Vertigo, Faintness, Ataxia                   |



## Running Title: Television Coverage and Health Score Symptoms

**Table 2.** Mann-Whitney U analyses of reporting rates of television-mentioned symptoms in the month before and after television media coverage.

| Symptom      | TV Report | Television Mention | Median Pre (IQR) | Median Post (IQR) | U     | P value | r     |
|--------------|-----------|--------------------|------------------|-------------------|-------|---------|-------|
| Headache     | 1         | Yes                | 0.0 (0.0)        | 5.0 (5.0)         | 22.0  | <.001   | -0.82 |
|              | 2         | Yes                | 2.0 (2.0)        | 7.0 (7.5)         | 76.0  | .001    | -0.53 |
|              | 3         | No                 | 4.5 (7.25)       | 5.5 (6.0)         | 180.5 | .597    | -0.08 |
| Itching      | 1         | No                 | 0.0 (0.0)        | 0.0 (1.0)         | 129.5 | .009    | -0.42 |
|              | 2         | Yes                | 0.0 (0.75)       | 2.0 (2.75)        | 77.0  | <.001   | -0.56 |
|              | 3         | No                 | 1.5 (3.0)        | 3.0 (4.0)         | 151.0 | .175    | -0.21 |
| Memory       | 1         | No                 | 0.0 (0.0)        | 0.0 (1.0)         | 126.0 | .011    | -0.40 |
| Problems     | 2         | Yes                | 0.0 (1.0)        | 2.0 (3.0)         | 48.5  | <.001   | -0.68 |
|              | 3         | No                 | 1.0 (2.0)        | 2.0 (4.75)        | 185.0 | .679    | -0.07 |
| Nausea       | 1         | Yes                | 0.0 (0.0)        | 2.0 (2.0)         | 38.0  | <.001   | -0.75 |
|              | 2         | No                 | 1.0 (1.75)       | 1.0 (1.75)        | 141.0 | .097    | -0.26 |
|              | 3         | No                 | 1.0 (2.75)       | 2.0 (2.0)         | 155.5 | .217    | -0.20 |
| Tiredness    | 1         | No                 | 0.0 (0.0)        | 1.0 (2.0)         | 86.5  | <.001   | -0.59 |
|              | 2         | Yes                | 1.0 (1.0)        | 3.0 (1.75)        | 73.0  | <.001   | -0.56 |
|              | 3         | No                 | 2.5 (2.0)        | 2.0 (2.75)        | 187.0 | .721    | -0.07 |
| Unsteadiness | 1         | No                 | 0.0 (0.0)        | 0.0 (1.75)        | 120.0 | .002    | -0.49 |
|              | 2         | No                 | 0.0 (1.0)        | 1.0 (1.75)        | 160.5 | .240    | -0.19 |
|              | 3         | Yes                | 0.5 (1.0)        | 2.0 (2.75)        | 119.0 | .023    | -0.36 |
| Vision       | 1         | Yes                | 0.0 (0.0)        | 2.0 (3.5)         | 27.5  | <.001   | -0.78 |
| Problems     | 2         | Yes                | 1.0 (1.0)        | 3.0 (4.5)         | 120.5 | .028    | -0.35 |
|              | 3         | Yes                | 2.0 (2.75)       | 4.5 (4.0)         | 143.0 | .120    | -0.25 |



**Impact of Television Coverage on the Number and Type of  
Symptoms Reported During a Health Scare: A Retrospective  
Pre-Post Observational Study**

|                                 |                                                                                                                                                                                     |
|---------------------------------|-------------------------------------------------------------------------------------------------------------------------------------------------------------------------------------|
| Journal:                        | <i>BMJ Open</i>                                                                                                                                                                     |
| Manuscript ID:                  | bmjopen-2012-001607.R1                                                                                                                                                              |
| Article Type:                   | Research                                                                                                                                                                            |
| Date Submitted by the Author:   | 12-Jul-2012                                                                                                                                                                         |
| Complete List of Authors:       | Petrie, Keith; University of Auckland<br>Faasse, Kate; University of Auckland, Psychological Medicine<br>Gamble, Greg; University of Auckland, Department of Medicine<br>Cundy, Tim |
| <b>Primary Subject Heading</b>: | Public health                                                                                                                                                                       |
| Secondary Subject Heading:      | Pharmacology and therapeutics                                                                                                                                                       |
| Keywords:                       | Mass media, television, nocebo, symptoms                                                                                                                                            |
|                                 |                                                                                                                                                                                     |

SCHOLARONE™  
Manuscripts

1 **Running Title: Television Coverage and Health Scare Symptoms**

2  
3 **Impact of Television Coverage on the Number and Type of Symptoms**

4  
5  
6 **Reported During a Health Scare: A Retrospective Pre-Post**

7  
8  
9 **Observational Study**

10  
11  
12  
13  
14 Kate Faasse<sup>1</sup> PhD candidate, Health Psychology

15  
16 Greg Gamble<sup>2</sup> Statistician, Honorary Research Fellow

17  
18 Tim Cundy<sup>2</sup> Professor of Medicine

19  
20  
21 Keith J Petrie<sup>1</sup> Professor of Health Psychology

22  
23  
24  
25  
26 <sup>1</sup> Department of Psychological Medicine, Faculty of Medical and Health Sciences,  
27  
28 University of Auckland, Auckland, New Zealand

29  
30 <sup>2</sup> Department of Medicine, Faculty of Medical and Health Sciences, University of  
31  
32 Auckland, Auckland, New Zealand

33  
34  
35  
36  
37 Address for correspondence: Professor Keith Petrie, Department of Psychological  
38  
39 Medicine, University of Auckland, PO Box 92019, Auckland 1142, New Zealand, +649  
40  
41 3737599 ext 86564, [kj.petrie@auckland.ac.nz](mailto:kj.petrie@auckland.ac.nz)

42  
43  
44  
45  
46  
47 Word count: 3064

48  
49  
50  
51  
52 Keywords: Mass media, television, psychosomatic symptoms, mass psychogenic illness,  
53  
54 nocebo.

## Running Title: Television Coverage and Health Scare Symptoms

### ABSTRACT

**Objectives:** This study investigated the impact of television news coverage on total adverse event reporting rates one month before and after the bulletins during a medication health scare. We further investigated whether individual side effects mentioned in each bulletin were reflected in the adverse event reports following the coverage. **Design:** A retrospective pre-post observational study. **Setting:** New Zealand Centre for Adverse Reactions Monitoring. **Participants:** Adverse events reported from May to December 2008 relating to Eltroxin formulation change. **Primary and Secondary Outcome Measures:** Primary outcome measure was the total rate of adverse event reporting per day. Secondary outcome measure was the rate of reporting of seven individual symptoms mentioned in the television coverage. **Results:** After story 1 a significant increase in total reporting rates was evident ( $Med_{pre} = 0$ ,  $Med_{post} = 13.5$ ,  $U = 2$ ,  $p < .001$ ,  $r = -0.86$ ) with larger effect sizes for increases in television-mentioned symptoms. Story 2 also showed a significant increase in total adverse event reporting ( $Med_{pre} = 6$ ,  $Med_{post} = 18.5$ ,  $U = 86.5$ ,  $p = .002$ ,  $r = -0.49$ ) driven by significant increases only in television-reported symptoms. Story 3 did not result in a significant increase in total reporting ( $Med_{pre} = 12$ ;  $Med_{post} = 15.5$ ;  $U = 171$ ,  $p = .432$ ,  $r = -0.12$ ), and showed a significant increase in reporting rates for only one of the two television-reported symptoms. **Conclusions:** The findings suggest that television news coverage can impact the overall rate of adverse event reporting during a health scare, in part via increased reporting of media-mentioned side effects. The effects of television media coverage on adverse event reporting appear strongest for earlier reports.

## Running Title: Television Coverage and Health Scare Symptoms

### Article Summary

#### Article focus:

- This study sought to understand the impact of media coverage on symptom reporting during a medication-related health scare.
- It was hypothesised that the rate of adverse event reporting would increase following television news coverage.
- It was also hypothesised that side effects specifically mentioned in television news reports would show greater increases following the news segments.

#### Key messages:

- Television news coverage of a health scare can significantly increase adverse event reporting in the month following the news bulletin.
- Reported adverse events that are mentioned as possible medication side effects in television news coverage increase more than side effects that are not mentioned in news coverage.
- Early television news coverage has a greater impact on adverse event reporting than bulletins broadcast later in a health scare after previous coverage.

#### Strengths and limitations of this study:

This study used adverse event report data from a national medicines monitoring database generated during a real-world medication-related health scare and actual television news coverage of the event. Creating a believable scenario of this scale in a laboratory setting is not feasible, and thus this study provides insight into the real impact of television media coverage on the volume and type of symptoms reported during a health scare.

**Running Title: Television Coverage and Health Scare Symptoms**

While this approach results in high ecological validity, as with any observational study there is a corresponding reduction in control of potential confounds.

For peer review only

## Running Title: Television Coverage and Health Scare Symptoms

### Introduction

News coverage can influence health behaviour in both positive and negative ways. There is evidence that media coverage can increase public anxiety by spreading fear of illness or contamination and greatly increasing demand for health services. A recent misleading media report in Japan about a “significant complication” in a cancer vaccine trial resulted in patient anxiety and an influx of inquiries which overwhelmed staff and resulted in temporary suspension of clinical trials and hospital services.[1] Intense media coverage of medically-unexplained adverse events following influenza A(H1N1) vaccination of school students in Taiwan spread fear and likely facilitated subsequent symptom clusters, ultimately resulting in sub-optimal levels of vaccination.[2] Similarly, media coverage of a suspected but unsubstantiated gas poisoning in the West Bank in 1983 facilitated the spread of psychogenic symptoms to over 900 people over two weeks.[3 4] There is evidence of media spread of symptoms reported by-proxy where parents of school children thought to be exposed to natural gas leaks reported various symptoms in their children at increased rates following intense media coverage.[5]

Misinformation in reports can also impact on health behaviour. Perhaps the most salient medical media controversy in recent times, media reporting on the MMR vaccine has misled the public about the weight of evidence for the safety of the vaccine.[6-8] The inaccurate reporting has impacted vaccination outcomes, with vaccination rates in England falling following the media coverage,[9] and parents who report getting information about the MMR vaccine from media sources less likely to accept a second dose of the MMR vaccine for their children.[10]

**Running Title: Television Coverage and Health Scare Symptoms**

1  
2  
3  
4  
5  
6 It should also be noted that media coverage also has the potential have a positive impact  
7  
8 on health-related behaviour. When news broke that Kylie Minogue had been diagnosed  
9  
10 with breast cancer, mammography appointment bookings in Australia rose 40% overall  
11  
12 with a 101% increase in bookings for previously non-screened women.[11] A similar  
13  
14 pattern emerged in cervical cancer screening in the United Kingdom following the  
15  
16 diagnosis and death of reality television personality Jade Goody.[12] Colonoscopy use  
17  
18 increased following Katie Couric's colorectal cancer awareness campaign in the United  
19  
20 States.[13] Media coverage has also increased sales of iodised salt following coverage of  
21  
22 iodine deficiency disorders.[14] More recently media coverage of research demonstrating  
23  
24 increased rates of stroke, coronary heart disease and breast cancer in women taking  
25  
26 combination hormone replacement therapy has been linked to declines in the use of  
27  
28 hormone therapy,[15] decreased prescriptions [16] and higher discontinuation of  
29  
30 treatment.[17] Greater decreases in use were seen in women exposed to more media  
31  
32 coverage which linked hormone replacement therapy to higher rates of cancer and heart  
33  
34 disease.[18]  
35  
36  
37  
38  
39  
40  
41  
42

43 One of the difficulties in researching how media reports influence the reporting of  
44  
45 symptoms during a health scare is that it is rarely possible to get measures of the level of  
46  
47 symptoms prior to a scare. However, a recent medication-related health scare in New  
48  
49 Zealand has enabled us to examine the effect of television news reporting on the volume  
50  
51 and type of symptoms reported by using data available through New Zealand's national  
52  
53 monitoring centre for drug adverse reactions. Moreover, it enabled us to look at whether  
54  
55  
56  
57  
58  
59  
60



**Running Title: Television Coverage and Health Scare Symptoms**

1  
2  
3 mentioning a specific side effect in a television bulletin resulted in an increase in the rates  
4  
5 of reporting of that specific symptom to the Centre for Adverse Reactions Monitoring  
6  
7 following the bulletin.  
8  
9

10  
11  
12 In New Zealand prior to 2008 the only publicly funded brand of thyroxine used for  
13  
14 thyroid hormone replacement treatment was the Eltroxin brand. During 2007 and 2008  
15  
16 the manufacturers made a change in the formulation of their tablets. While the active  
17  
18 ingredient in the tablets remained unchanged, the 100 µg tablets were changed from  
19  
20 yellow to white and labelled as levothyroxine rather than thyroxine. Testing of the new  
21  
22 tablets revealed that they contained the same levels of active ingredient, were  
23  
24 bioequivalent to an older formulation, and contained no unexpected ingredients.  
25  
26

27  
28 However, the change resulted in a dramatic increase in reporting of adverse reactions to  
29  
30 the drug to the New Zealand Centre for Adverse Reactions Monitoring. Further details  
31  
32 about the response to the medication change and the factors involved in the development  
33  
34 of the health scare have been discussed previously.[19]  
35  
36  
37  
38

39  
40  
41 In this study we examined the effect of three television news stories on the number and  
42  
43 type of adverse reaction reports received by the Centre for Adverse Reactions  
44  
45 Monitoring. Based on previous research, we predicted that adverse event reporting  
46  
47 would occur at a higher rate during the month following a television news story than in  
48  
49 the month preceding the story, and that the rates of reporting of media-mentioned  
50  
51 symptoms (but not unmentioned symptoms) would be higher during the month following  
52  
53 television media coverage than in the month before.  
54  
55  
56  
57  
58  
59  
60

## Running Title: Television Coverage and Health Scare Symptoms

### Methods

#### *Media Coverage*

Television news coverage of the formulation change was chosen for assessment because television is a widely viewed news source that has national coverage and is generally viewed by the public on the same date. In order to identify all television news reports available that went to air between May and December 2008, a comprehensive search strategy was used. Searches were conducted on online news databases (Australia / New Zealand Reference Centre, Factiva, Index New Zealand, Newztext Plus), commonly used news websites (stuff.co.nz, nzherald.co.nz), and on the websites of the three free-to-air national television news stations (tvnz.co.nz, 3news.co.nz, primetv.co.nz) using a standard list of search terms (Eltroxin, Goldshield, Synthroid, thyroid, thyroxine, levothyroxine, hypothyroid, hypothyroidism, GSK, Glaxo, GlaxoSmithKline). From these searches, three television news stories were identified [20-22] which went to air on June 17, August 15 and September 10. These were the only television news segments related to the Eltroxin formulation change identified in our extensive search process that went to air during the time period under investigation. Videos were retrieved from the relevant website and the clips were transcribed. From these transcripts, a list of all media-reported side effects attributed to Eltroxin was generated.

#### *Adverse Drug Reactions*

Adverse drug reaction reporting data were obtained from the Centre for Adverse Reactions Monitoring (CARM) through Medsafe (New Zealand's medicines and medical

**Running Title: Television Coverage and Health Scare Symptoms**

1  
2  
3 devices monitoring agency) following an Official Information Act request. CARM  
4  
5 collects adverse event reports about medications. These reports are generally made by  
6  
7 GPs, pharmacists, hospitals and pharmaceutical companies, though patients can also  
8  
9 report directly to the centre. Data provided included the date that the reports were  
10  
11 received and processed by CARM and up to five reported symptoms. Reports were  
12  
13 anonymous and no identifying information was provided. Data were obtained for May  
14  
15 2008 to December 2008 inclusive, providing adverse event reporting information for the  
16  
17 eight months during which the highest rates of reporting occurred. The current research  
18  
19 did not require separate ethical approval as the study utilised publicly available data and  
20  
21 patients who made the ADR reports remained anonymous to the researchers.  
22  
23  
24  
25  
26  
27  
28  
29

*Symptoms*

30  
31  
32 To enable comparisons between the symptoms mentioned in the television media  
33  
34 coverage and those mentioned in adverse event reports, all reports were reviewed and  
35  
36 media-mentioned symptoms were matched with reported symptoms that best represented  
37  
38 them. Symptoms mentioned in at least one of the three television news reports were  
39  
40 headache, tiredness, memory problems, nausea, vomiting, vision loss, blurred vision,  
41  
42 blindness, light sensitivity, dry eyes, dry mouth, swollen ankles, itching, aches and pains,  
43  
44 arthritis, trembles, and unsteadiness. Symptoms that were reported in less than 5% (n =  
45  
46 69) of all Eltroxin-reformulation adverse event reports were excluded (vomiting, light  
47  
48 sensitivity, dry eyes, dry mouth, swollen ankles, arthritis and trembles). Because vision  
49  
50 symptoms (vision loss, blurred vision and blindness) were reported once each in the three  
51  
52 media reports, these were grouped as 'vision problems' for the analyses. The media-  
53  
54  
55  
56  
57  
58  
59  
60

## Running Title: Television Coverage and Health Scare Symptoms

1  
2  
3 reported symptom of ‘aches and pains’ was considered too broad, with no logical  
4  
5 corresponding general ‘pain’ symptoms in the adverse event report data, so was excluded  
6  
7  
8 from the analyses. ‘Unsteadiness’ was not easily matched with adverse event report  
9  
10 symptoms, but was considered similar to dizziness, faintness, vertigo or ataxia (lack of  
11  
12 coordination), which were grouped together for analysis. The media-reported symptoms  
13  
14 and their corresponding adverse event report symptoms can be seen in Table 1.  
15  
16

17  
18  
19  
20 (Insert Table 1 about here)  
21  
22  
23  
24  
25  
26

### Statistical Analysis

27  
28  
29 A period of one month (four weeks) before and after each television segment was used to  
30  
31 investigate the impact of media reporting. No adverse event reports were recorded on  
32  
33 weekend days, thus analyses were carried out only using data on the number of reports  
34  
35 each weekday during each four week total time period, resulting in a total of 20 weekdays  
36  
37 before and after each television report being used in the analyses. This time frame was  
38  
39 chosen to allow for enough data in order to generate reliable analyses, but was restricted  
40  
41 enough to limit overlap between the month after the first television coverage and the  
42  
43 month before the second television coverage. Because the third news story went to air  
44  
45 less than a month after the second, an overlap of 17 days for these time periods was  
46  
47  
48  
49  
50 unavoidable.  
51  
52  
53  
54  
55  
56  
57  
58  
59  
60

## Running Title: Television Coverage and Health Scare Symptoms

The distributions of the daily rates of total **Eltroxin-related** adverse event reporting and rates of reporting of individual symptoms were non-normal and non-parametric tests were utilised. Mann-Whitney U tests were used to investigate the number of adverse events reported per day for both total number of reports and individual symptoms before and after each television news report. Specific media-reported symptoms (headache, itching, memory problems, nausea, tiredness, unsteadiness and vision problems) not mentioned in a given television report were treated as control comparison symptoms.

All tests were two-tailed,  $p < .05$  was considered significant.

## Results

### Adverse Event Reports Per Month

Figure 1 gives an overview of the pattern of adverse event reports made to the Centre for Adverse Reactions Monitoring from January to December 2008. The largest increases in month-by-month reporting came between May and June, and August and September.

(Insert Figure 1 about here)

### Total Adverse Event Reports Per Day

The number of reports per day increased significantly from the month before news story 1 (Mdn = 0) to the month after (Mdn = 13.5,  $U = 2.0$ ,  $p < .001$ ,  $r = -0.86$ ) (see Figure 2). Reporting had not returned to pre-media levels during the month before news story 2 (Mdn = 6). Nonetheless a significant increase in adverse event reporting was also seen

## Running Title: Television Coverage and Health Scare Symptoms

1  
2  
3 from the month before to the month after the second television report (Mdn = 18.5, U =  
4  
5 86.5,  $p = .002$ ,  $r = -0.49$ ). There was a large overlap (17 reporting days) between the  
6  
7 month after news story 2 and the month before news story 3. There was not a significant  
8  
9 additional impact of the third television report on the rate of symptom reporting (Mdn<sub>pre</sub>  
10  
11 = 12, Mdn<sub>post</sub> = 15.5, U = 171,  $p = .432$ ,  $r = -0.12$ ).  
12  
13  
14

15  
16  
17  
18 (Insert Figure 2 about here)  
19

### Individual Symptoms Reported Per Day

#### *News Story 1*

20  
21  
22  
23  
24  
25  
26  
27 There was a significant increase in the rate of adverse event reports containing the  
28  
29 investigated symptoms from the month before news story 1 to the month after. This was  
30  
31 found for all individual symptoms, whether or not they were mentioned in the television  
32  
33 news story (see Table 2). The effect size for the increases associated with symptoms  
34  
35 mentioned in news story 1 (headache, nausea and vision problems) were notably higher ( $r$   
36  
37 = -0.82, -0.75 and -0.78 respectively) than those associated with the unmentioned  
38  
39 symptoms (all  $r$  values < -0.60).  
40  
41  
42  
43  
44

45  
46 (Insert Table 2 about here)  
47

#### *News Story 2*

48  
49  
50  
51  
52  
53 Five symptoms (headache, vision loss, itching, memory problems and tiredness) were  
54  
55 mentioned in the second television news story. The rate of reporting for all of the  
56  
57  
58  
59  
60

**Running Title: Television Coverage and Health Scare Symptoms**

1  
2  
3 mentioned symptoms increased significantly (all p values < .03) from the month before to  
4  
5 the month after the media coverage, while the rate of reporting for the two unmentioned  
6  
7 symptoms (nausea and unsteadiness) did not show significant increases (all p values >  
8  
9 .09) (see Table 2).  
10  
11

*News Story 3*

12  
13  
14  
15  
16  
17 Only two symptoms (vision loss and unsteadiness) were mentioned in the third news  
18  
19 story. The rate of reporting for unsteadiness increased significantly from before (Med =  
20  
21 0.5) to after (Med = 2.0) the third television news story (p = .028) (see Table 2). The rate  
22  
23 of reporting of vision problems also increased from before (Med = 2.0) to after (Med =  
24  
25 4.5) the television coverage, however this difference was not significant (p = .12). This  
26  
27 may be due to the consistent media coverage of vision problems across all three  
28  
29 television news stories. In addition, the month before news story 3 had a large overlap  
30  
31 with the month after news story 2 in which vision problems were also mentioned, and  
32  
33 reporting of vision problems was already elevated. The rates of reporting of the five  
34  
35 remaining unmentioned symptoms did not change significantly over this time period (all  
36  
37 p values > .17).  
38  
39  
40  
41  
42  
43  
44  
45  
46

**Discussion**

47  
48  
49 Television media coverage during the Eltroxin formulation-change health scare impacted  
50  
51 both the volume and content of adverse effect reporting from the month before to the  
52  
53 month after each of the three news stories, and had a differential impact on adverse event  
54  
55 reporting as time went on. News story 1, which was the first television news coverage of  
56  
57  
58  
59  
60

**Running Title: Television Coverage and Health Scare Symptoms**

1  
2  
3 the formulation change, had a dramatic impact on total symptom reporting. The rates of  
4 reporting for all symptoms assessed increased significantly regardless of whether they  
5 were mentioned in this report or not, although the effect sizes associated with the changes  
6 suggest that the effect of the media coverage was strongest for the symptoms that were  
7 mentioned. News story 2 also generated a significant increase in the total **Eltroxin-related**  
8 adverse event reporting. Further investigation of individual symptoms suggests that this  
9 increase was primarily driven by significant increases in reporting rates only in symptoms  
10 that were mentioned in the second television news coverage. Total symptom reporting  
11 rates did not increase significantly following news story 3, and while both symptoms  
12 mentioned in the coverage increased, only the symptom that hadn't already been  
13 mentioned in the previous television report reached significance.  
14  
15  
16  
17  
18  
19  
20  
21  
22  
23  
24  
25  
26  
27  
28  
29  
30  
31

32 Increases in symptom reporting are likely to have been caused by at least three different  
33 processes. First, exposure to television news coverage about health risks can increase  
34 viewers' anxiety about their own health.[23 24] Increased levels of anxiety are  
35 consistently associated with increased symptom reporting.[25] This process is likely to be  
36 responsible for part of the large increase in symptoms reported as shown by the rise in the  
37 overall rate of symptom reporting and increases in all individual symptoms assessed  
38 following the first television news report.  
39  
40  
41  
42  
43  
44  
45  
46  
47  
48  
49  
50

51 Second, television news coverage of selected individuals' specific symptoms is likely to  
52 have increased thyroxine patients' expectations of specific side effects. This is likely to  
53 have promoted increased attention to the set of symptoms reported in the media. This led  
54  
55  
56  
57  
58  
59  
60



**Running Title: Television Coverage and Health Scare Symptoms**

1  
2  
3 to elevated numbers of symptoms specifically mentioned in the television news media, as  
4  
5 seen particularly following the second and third television news stories. These results are  
6  
7 in line with previous studies which have found that the awareness of specific potential  
8  
9 medication side effects can increase the reporting of those side effects. [26-28]  
10  
11

12  
13  
14  
15 Finally, it is also probable that the media coverage of the Eltroxin formulation change  
16  
17 increased the likelihood that patients themselves would make adverse event reports, and  
18  
19 that health professionals would also enquire about or notice these symptoms in their  
20  
21 patients, attribute them to the medication and report these symptoms as adverse drug  
22  
23 reactions. Media coverage has previously been shown to increase reports of adverse drug  
24  
25 reactions.[29] Medsafe, New Zealand's medicines and medical devices monitoring  
26  
27 agency, has noted that the Eltroxin health scare generated an unusually large amount of  
28  
29 adverse event reports directly from the public.[30] The media coverage of the  
30  
31 formulation change is likely to have influenced anxiety levels and symptom expectations,  
32  
33 as well as encouraging both individual patients and health care professionals to report  
34  
35 these symptoms as adverse events.  
36  
37  
38  
39  
40  
41  
42

43 These findings invite consideration of current health media coverage, which in the case of  
44  
45 Eltroxin was often based around dramatic stories told by individual patients about their  
46  
47 experiences of extremely unpleasant adverse events following the medication formulation  
48  
49 change. More balanced coverage including alternate viewpoints, with input from health  
50  
51 professionals and government agencies, and without sensationalised coverage of  
52  
53  
54  
55  
56  
57  
58  
59  
60

## Running Title: Television Coverage and Health Scare Symptoms

1  
2  
3 potentially unrelated individual symptom experiences - which are widely acknowledged  
4  
5 to be highly variable - could have been of benefit.  
6  
7  
8  
9

### Limitations

10  
11  
12 The current study focused on adverse events reported to the Centre of Adverse Reactions  
13  
14 Monitoring, and thus may not generalise to patients who experienced adverse events but  
15  
16 did not report them either to CARM or to a healthcare provider. This limitation may also  
17  
18 be viewed as a strength of the study. The data generally came from people who went to  
19  
20 the trouble of making a report or talking to a medical professional who then made the  
21  
22 report on their behalf. The use of this outcome data likely reduced the impact of the  
23  
24 television news media on symptom reporting in comparison to questionnaire-based  
25  
26 assessment of side effects, likely making the current findings more robust. While the use  
27  
28 of a real-world case study enhances the ecological validity of the current research, this  
29  
30 approach also precludes controlling potential confounding variables such as underlying  
31  
32 trait anxiety, patients' beliefs about medications, level of exposure to Eltroxin-related  
33  
34 media coverage, and participation in thyroid support or discussion groups either online or  
35  
36 face-to-face.  
37  
38  
39  
40  
41  
42  
43  
44

45  
46 While unlikely, overall reporting of adverse events from all causes may have also  
47  
48 increased over the study period. The possibility of reverse causation must also be  
49  
50 considered. It is feasible that the media coverage of the Eltroxin formulation change was  
51  
52 driven by the number of adverse event reports received by CARM, rather than the media  
53  
54 coverage driving adverse event reporting. However it seems more likely that television  
55  
56  
57  
58  
59  
60

**Running Title: Television Coverage and Health Scare Symptoms**

1  
2  
3 media coverage preceded symptom reporting given the current results. First, the increase  
4  
5 in overall Eltroxin-related adverse event reports rose dramatically following television  
6  
7 coverage, particularly after the first news segment. Second, the symptoms that are  
8  
9 mentioned in the adverse event reports are also influenced by the content of the television  
10  
11 stories, with side effects discussed in the media tending to be reported more frequently  
12  
13 following the news segments.  
14  
15  
16  
17  
18  
19

Conclusions

20  
21  
22 Television news coverage of a medication-related health scare has the potential to  
23  
24 dramatically increase the overall rate of adverse event reporting in the month following a  
25  
26 news story, particularly in the early stages of a health scare. This may be because such  
27  
28 news coverage increases anxiety in viewers, leading to a general increase in symptoms  
29  
30 that people experience. The reporting of symptoms specifically mentioned in television  
31  
32 news coverage also increased significantly following the news stories, likely by  
33  
34 increasing viewers' expectations that they too would experience similar side effects.  
35  
36  
37  
38  
39  
40  
41  
42  
43  
44  
45  
46  
47  
48  
49  
50  
51  
52  
53  
54  
55  
56  
57  
58  
59  
60

## Running Title: Television Coverage and Health Scare Symptoms

### Acknowledgments

The authors would like to thank Medsafe for their assistance in obtaining the adverse event reporting data used in this study.

### Competing Interests

None declared.

### Funding

This research received no specific grant from any funding agency in the public, commercial or not-for-profit sectors.

### Authors' Contributions

KF: Conception and design of the study; analysis and interpretation of data; collection and assembly of data; drafting of the article; critical revision of the article for important intellectual content; final approval of the article.

GG: Analysis and interpretation of data; critical revision of the article for important intellectual content; final approval of the article.

TC: Conception and design of the study; critical revision of the article for important intellectual content; final approval of the article.

KP: Conception and design of the study; collection and assembly of data; drafting of the article; critical revision of the article for important intellectual content; final approval of the article.

**Running Title: Television Coverage and Health Scare Symptoms****References**

1. Yuji K, Narimatsu H, Tanimoto T, et al. Sharing information on adverse events. *Lancet* 2011;**377**:1654
2. Huang WT, Hsu CC, Lee PI, et al. Mass psychogenic illness in nationwide in-school vaccination for pandemic influenza A(H1N1) 2009, Taiwan, November 2009-January 2010. *Euro Surveill* 2010;**15**(21):1-3
3. Modan B, Swartz TA, Tirosh M, et al. The Arjenyattah epidemic a mass phenomenon: spread and triggering factors. *Lancet* 1983;**31**(1472-1474)
4. Hefez A. The role of the press and the medical community in the epidemic of "mysterious gas poisoning" in the Jordan West Bank. *Am J Psychiatry* 1985;**142**:833-37
5. Philen RM, Kilbourne EM, McKinley TW, et al. Mass sociogenic illness by proxy: parentally reported epidemic in an elementary school. *Lancet* 1989;**334**:1372-76
6. Dobson R. Media misled the public over the MMR vaccine, study says. *BMJ* 2003;**326**:1107
7. Speers T, Lewis J. Journalists and jabs: media coverage of the MMR vaccine. *Commun Med* 2004;**1**:171-81
8. Goldacre B. MMR: the scare stories are back. *BMJ* 2007;**335**:126-27
9. Scanlon TJ. MMR vaccine uptake may be lower than reported because of manipulation of target groups. *BMJ* 2002;**324**:733
10. Petrovic M, Roberts R, Ramsay M, et al. Parents' attitude towards the second dose of measles, mumps and rubella vaccine: a case-control study. *Commun Dis Public Health* 2003;**6**:325-29
11. Chapman S, McLeod K, Wakefield M, et al. Impact of news of celebrity illness on breast cancer screening: Kylie Minogue's breast cancer diagnosis. *MJA* 2005;**183**:247-50
12. Bowring J, Walker P. The "Jade Goody effect": what now for cervical cancer prevention? *J Fam Plann Reprod Health Care* 2010;**36**:51-54
13. Cram P, Fendrick M, Inadomi J, et al. The impact of a celebrity promotional campaign on the use of colon cancer screening: the Katie Couric effect. *Arch Intern Med* 2003;**163**:1601-05
14. Li M, Chapman S, Agho K, et al. Can even minimal news coverage influence consumer health-related behaviour? A case study of iodized salt sales, Australia. *Health Educ Res* 2008;**23**:543-48
15. Haas JS, Kaplan CP, Gerstenberger EP, et al. Changes in the use of postmenopausal hormone therapy after the publication of clinical trials. *Ann Intern Med* 2004;**140**:184-88
16. Majumdar SR, Almasi EA, Stafford RS. Promotion and prescribing of hormone therapy after report of harm by the Women's Health Initiative. *JAMA* 2004;**292**:1983-88
17. Lawton B, Rose S, McLeod D, et al. Changes in use of hormone replacement therapy after the report from the Women's Health Initiative: cross sectional survey of users. *BMJ* 2003;**327**:845-46

**Running Title: Television Coverage and Health Scare Symptoms**

18. Haas JS, Miglioretti DL, Geller B, et al. Average household exposure to newspaper coverage about the harmful effects of hormone therapy and population-based declines in hormone therapy use. *JGIM* 2007;**22**:68-73
19. Faasse K, Cundy T, Pertie KJ. Thyroxine: anatomy of a health scare. *BMJ* 2009;**339**:b5613
20. 3 News. Change of drug formula making patients feel worse, 17 June 2008.
21. 3 News. Government to announce alternative drug to Eltroxin, 10 September 2008.
22. TVNZ Close Up. Thyroid, 15 August 2008.
23. Lemal M, Van den Bulck J. Television news exposure is related to fear of breast cancer. *Prev Med* 2009;**48**:189-92
24. Lemal M, Van den Bulck J. Television news coverage about cervical cancer: impact on female viewers' vulnerability perceptions and fear. *Eur J Public Health* 2010;**21**:381-86
25. Piccinelli M, Simon G. Gender and cross-cultural differences in somatic symptoms associated with emotional distress: an international study in primary care. *Psychol Med* 1997;**27**:433-44
26. Cocco G. Erectile dysfunction after therapy with Metoprolol: the Hawthorne Effect. *Cardiology* 2009;**112**:174-77
27. Myers MG, Cairns JA, Singer J. The consent form as a possible cause of side effects. *Clin Pharmacol Ther* 1987;**42**:250-53
28. Silvestri A, Galetta P, Cerquetani E, et al. Report of erectile dysfunction after therapy with beta-blockers is related to patient knowledge of side effects and is reversed by placebo. *Eur Heart J* 2003;**24**:1928-32
29. Martin RM, May M, Gunnell D. Did intense adverse media publicity impact on prescribing of paroxetine and the notification of suspected adverse drug reactions? Analysis of routine databases, 2001-2004. *Br J Clin Pharmacol* 2005;**61**:224-28
30. Eltroxin (levothyroxine) formulation change. *BPAC* 2008;**15**:48-50

**Running Title: Television Coverage and Health Scare Symptoms**

1  
2  
3  
4  
5  
6  
7  
8  
9  
10  
11  
12  
13  
14  
15  
16  
17  
18  
19  
20  
21  
22  
23  
24  
25  
26  
27  
28  
29  
30  
31  
32  
33  
34  
35  
36  
37  
38  
39  
40  
41  
42  
43  
44  
45  
46  
47  
48  
49

For peer review only

## Running Title: Television Coverage and Health Scare Symptoms

**Table 1.** Side effects mentioned in television news coverage and corresponding symptoms in Centre for Adverse Reactions Monitoring data.

| News Story | Television-mentioned symptoms | Corresponding adverse reactions in CARM database    |
|------------|-------------------------------|-----------------------------------------------------|
| Story 1    | Headache                      | Headache                                            |
|            | Nausea                        | Nausea                                              |
|            | Vision problems               | Vision blurred, Vision abnormal, Visual disturbance |
| Story 2    | Headache                      | Headache                                            |
|            | Vision problems               | Vision blurred, Vision abnormal, Visual disturbance |
|            | Itching                       | Pruritus                                            |
|            | Tired                         | Tiredness                                           |
|            | Memory problems               | Memory disturbance, Memory impairment, Memory loss  |
| Story 3    | Vision problems               | Vision blurred, Vision abnormal, Visual disturbance |
|            | Unsteadiness                  | Dizzy, Vertigo, Faintness, Ataxia                   |



## Running Title: Television Coverage and Health Score Symptoms

**Table 2.** Mann-Whitney U analyses of reporting rates of television-mentioned symptoms in the month before and after television media coverage.

| Symptom      | TV Report | Television Mention | Median Pre (IQR) | Median Post (IQR) | U     | P value | r     |
|--------------|-----------|--------------------|------------------|-------------------|-------|---------|-------|
| Headache     | 1         | Yes                | 0.0 (0.0)        | 5.0 (5.0)         | 22.0  | <.001   | -0.82 |
|              | 2         | Yes                | 2.0 (2.0)        | 7.0 (7.5)         | 76.0  | .001    | -0.53 |
|              | 3         | No                 | 4.5 (7.25)       | 5.5 (6.0)         | 180.5 | .597    | -0.08 |
| Itching      | 1         | No                 | 0.0 (0.0)        | 0.0 (1.0)         | 129.5 | .009    | -0.42 |
|              | 2         | Yes                | 0.0 (0.75)       | 2.0 (2.75)        | 77.0  | <.001   | -0.56 |
|              | 3         | No                 | 1.5 (3.0)        | 3.0 (4.0)         | 151.0 | .175    | -0.21 |
| Memory       | 1         | No                 | 0.0 (0.0)        | 0.0 (1.0)         | 126.0 | .011    | -0.40 |
| Problems     | 2         | Yes                | 0.0 (1.0)        | 2.0 (3.0)         | 48.5  | <.001   | -0.68 |
|              | 3         | No                 | 1.0 (2.0)        | 2.0 (4.75)        | 185.0 | .679    | -0.07 |
| Nausea       | 1         | Yes                | 0.0 (0.0)        | 2.0 (2.0)         | 38.0  | <.001   | -0.75 |
|              | 2         | No                 | 1.0 (1.75)       | 1.0 (1.75)        | 141.0 | .097    | -0.26 |
|              | 3         | No                 | 1.0 (2.75)       | 2.0 (2.0)         | 155.5 | .217    | -0.20 |
| Tiredness    | 1         | No                 | 0.0 (0.0)        | 1.0 (2.0)         | 86.5  | <.001   | -0.59 |
|              | 2         | Yes                | 1.0 (1.0)        | 3.0 (1.75)        | 73.0  | <.001   | -0.56 |
|              | 3         | No                 | 2.5 (2.0)        | 2.0 (2.75)        | 187.0 | .721    | -0.07 |
| Unsteadiness | 1         | No                 | 0.0 (0.0)        | 0.0 (1.75)        | 120.0 | .002    | -0.49 |
|              | 2         | No                 | 0.0 (1.0)        | 1.0 (1.75)        | 160.5 | .240    | -0.19 |
|              | 3         | Yes                | 0.5 (1.0)        | 2.0 (2.75)        | 119.0 | .023    | -0.36 |
| Vision       | 1         | Yes                | 0.0 (0.0)        | 2.0 (3.5)         | 27.5  | <.001   | -0.78 |
| Problems     | 2         | Yes                | 1.0 (1.0)        | 3.0 (4.5)         | 120.5 | .028    | -0.35 |
|              | 3         | Yes                | 2.0 (2.75)       | 4.5 (4.0)         | 143.0 | .120    | -0.25 |

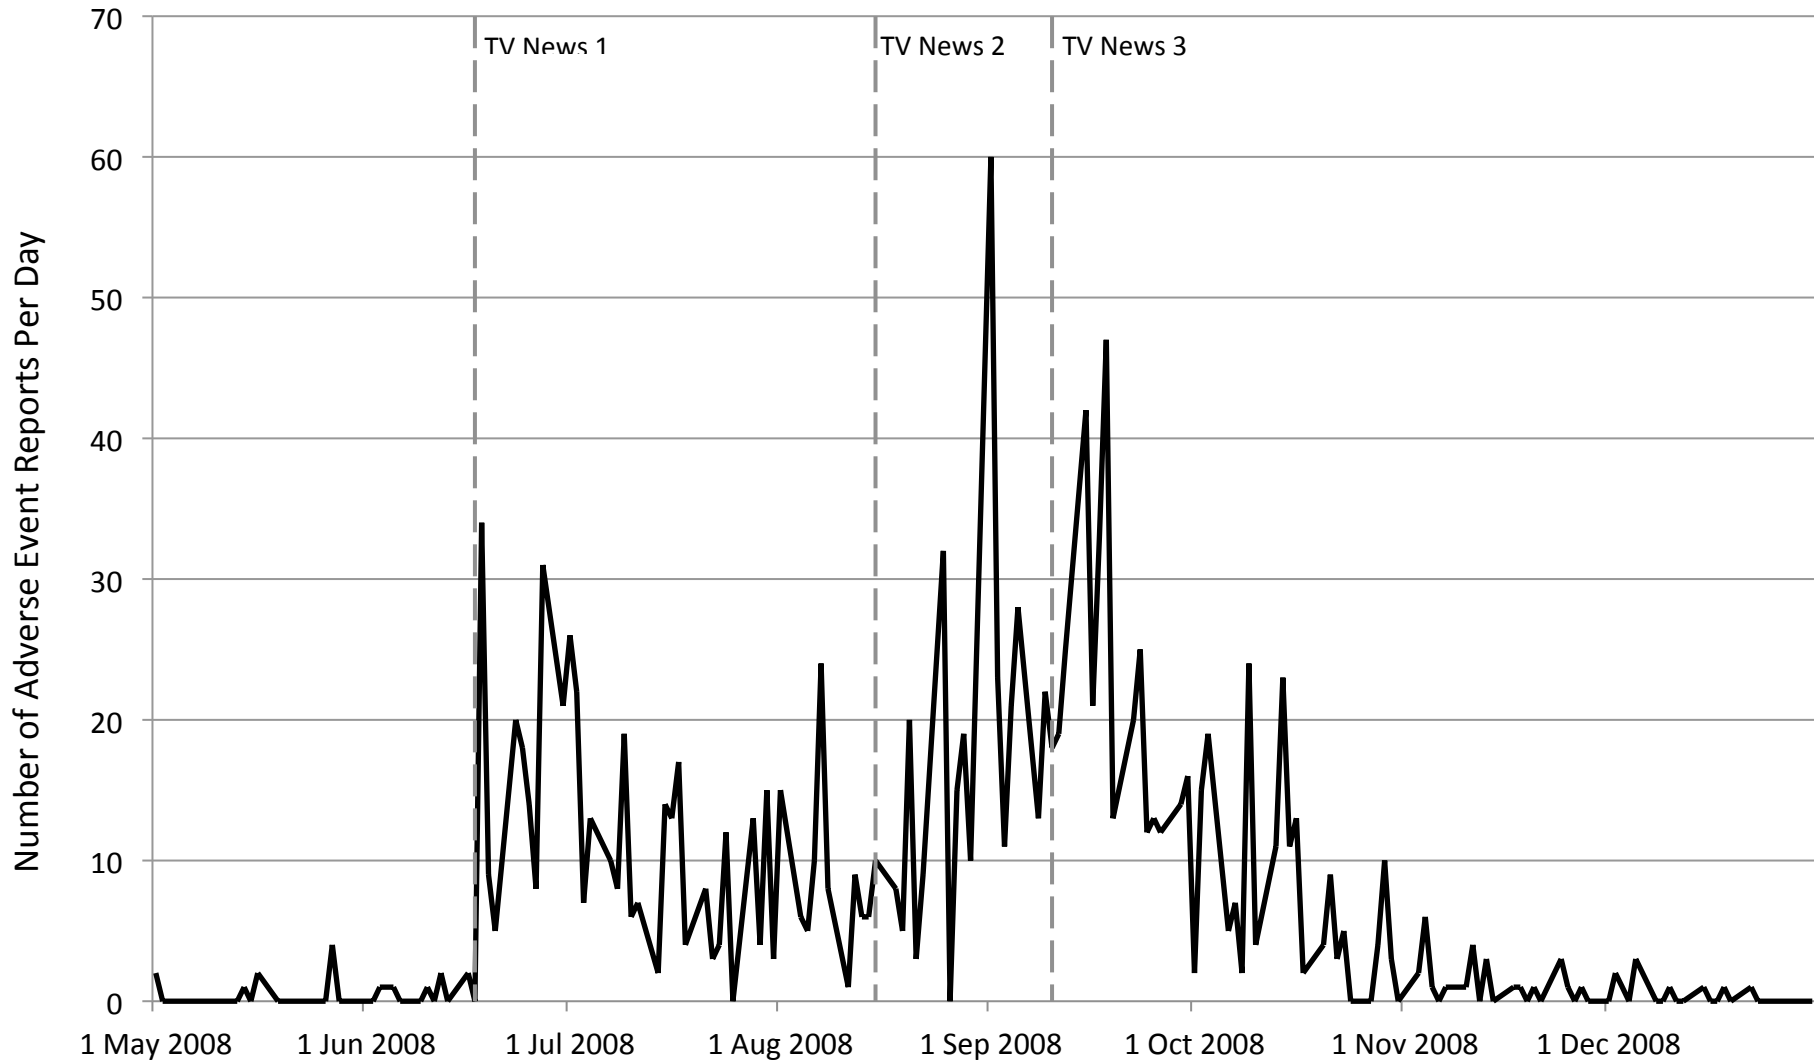

Supplement: bmjopen-2012-001607.draft_revisions.pdf [file bmjopen-2012-001607.draft_revisions.pdf]
